# Supplementary material for: Designer stabilizer for preparation of pristine graphene/polysiloxane films and networks
Source: Royal Society of Chemistry journal article supplement (doi:10.1039/c4nr01431f), 2014-01-01
Supplement: c4nr01431f1.pdf [file c4nr01431f1.pdf]

## Designer Stabilizer for Preparation of Pristine Graphene/Polysiloxane Films and Networks

Dorsa Parviz, Ziniu Yu, Ronald C. Hedden,\* Micah J. Green\*\*

*Department of Chemical Engineering, Texas Tech University, Lubbock, Texas 79409, USA*

*+Current address: Department of Chemical Engineering, Texas A&M University, College Station, TX 77843, USA*

*\*corresponding author (polymer synthesis): [ronald.hedden@ttu.edu](mailto:ronald.hedden@ttu.edu)*

*\*\*corresponding author (graphene nanomaterials): [micah.green@tamu.edu](mailto:micah.green@tamu.edu)*

### Supporting Information

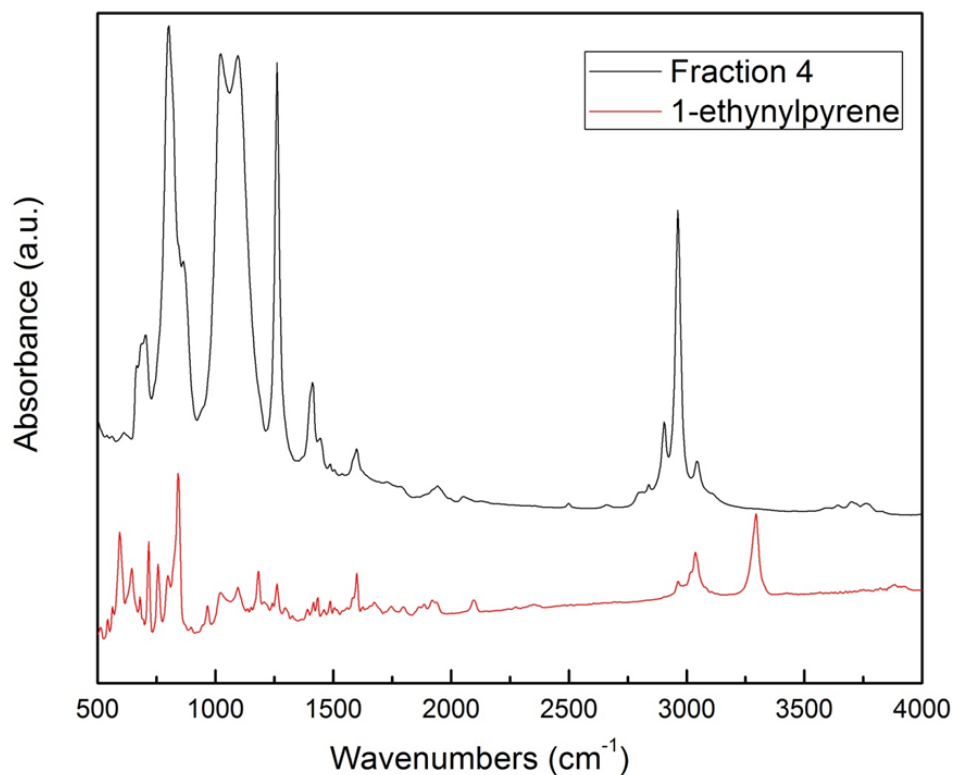

Figure S1. FT-IR spectra of fraction 4 of the PMPyS sample.

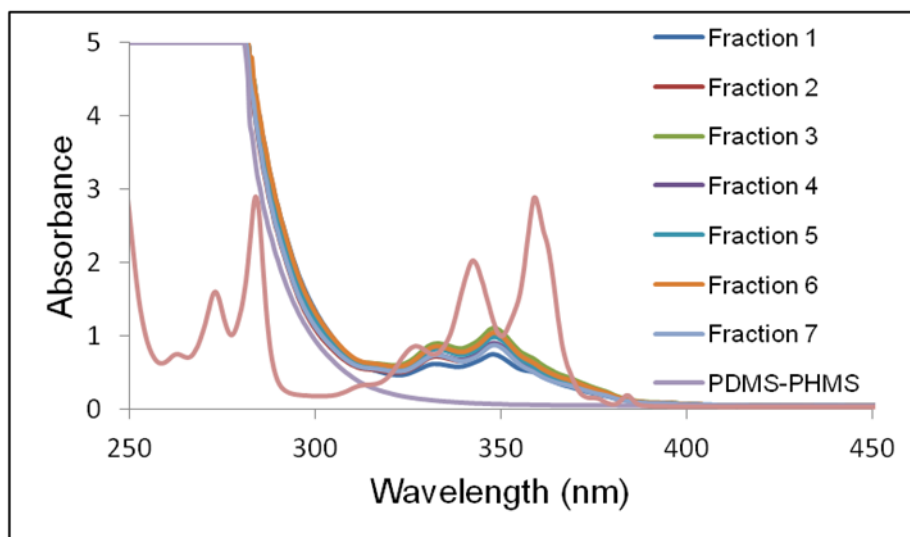

Figure S2. UV-vis spectra of the polymer precursors and PMPyS fractions.

|                             | Fraction 1 | Fraction 2 | Fraction 3 | Fraction 4 | Fraction 5 | Fraction 6 | Fraction 7 |
|-----------------------------|------------|------------|------------|------------|------------|------------|------------|
| <b>Pyrene content (wt%)</b> | 8.43       | 9.57       | 16.85      | 8.86       | 12.91      | 13.89      | 10.58      |

Table S1. Pyrene content of different PMPyS fractions (based on the area under UV-vis spectra of each fraction)

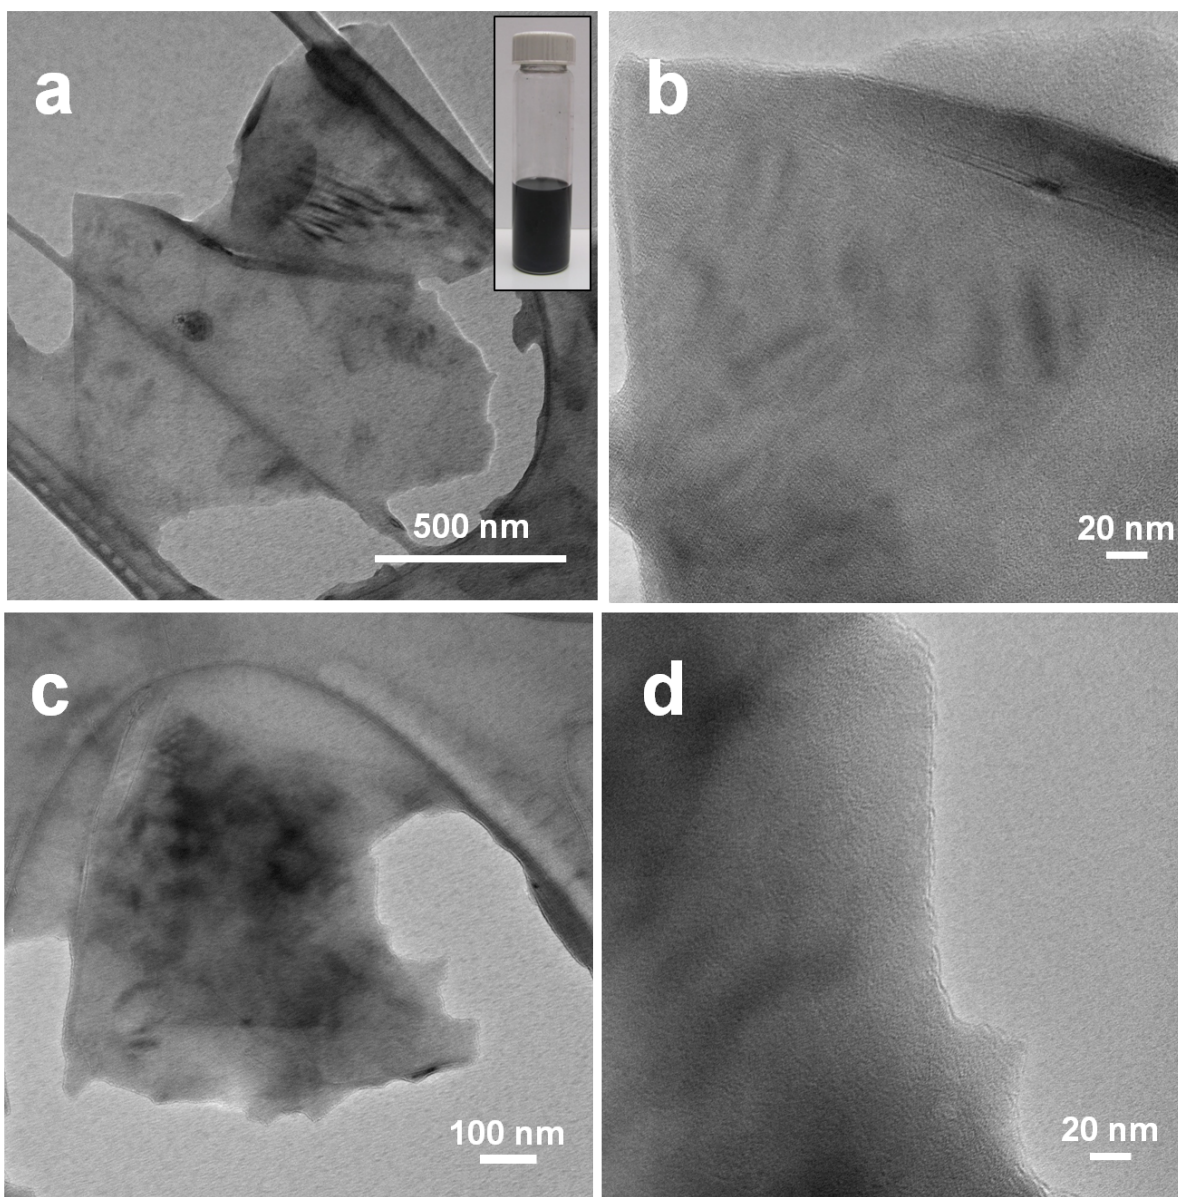

Figure S3. (a) and (c) Additional TEM images of the graphene sheets in the dispersion obtained from fraction 3 of the PMPyS polymers; inset is the graphene dispersion prepared by fraction 3 of PMPyS, (b) and (d) the edge of the same graphene sheets which shows the few-layer nature of the PDMS-stabilized graphene in the dispersion.

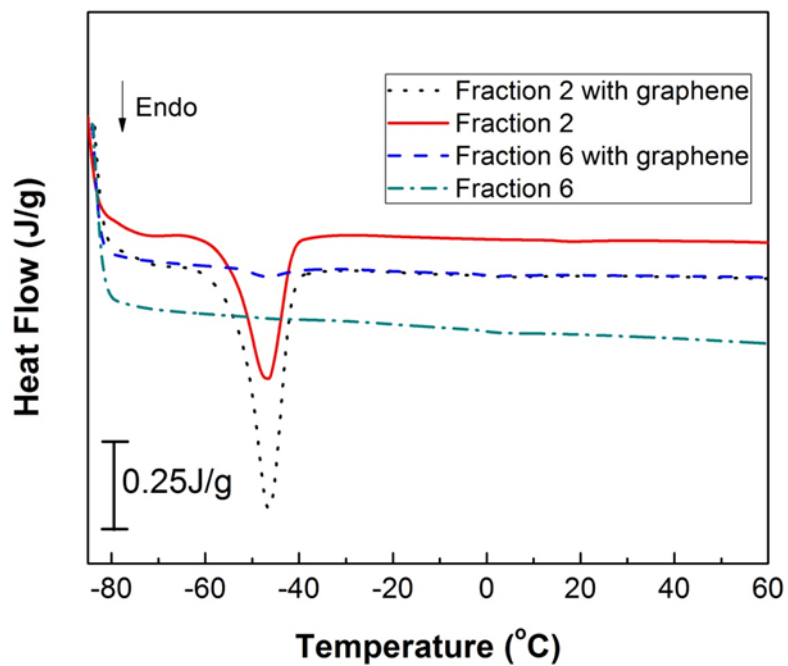

Figure S4. DSC heating traces for fractions 2 and 6 of PMPyS and PMPyS-G samples.

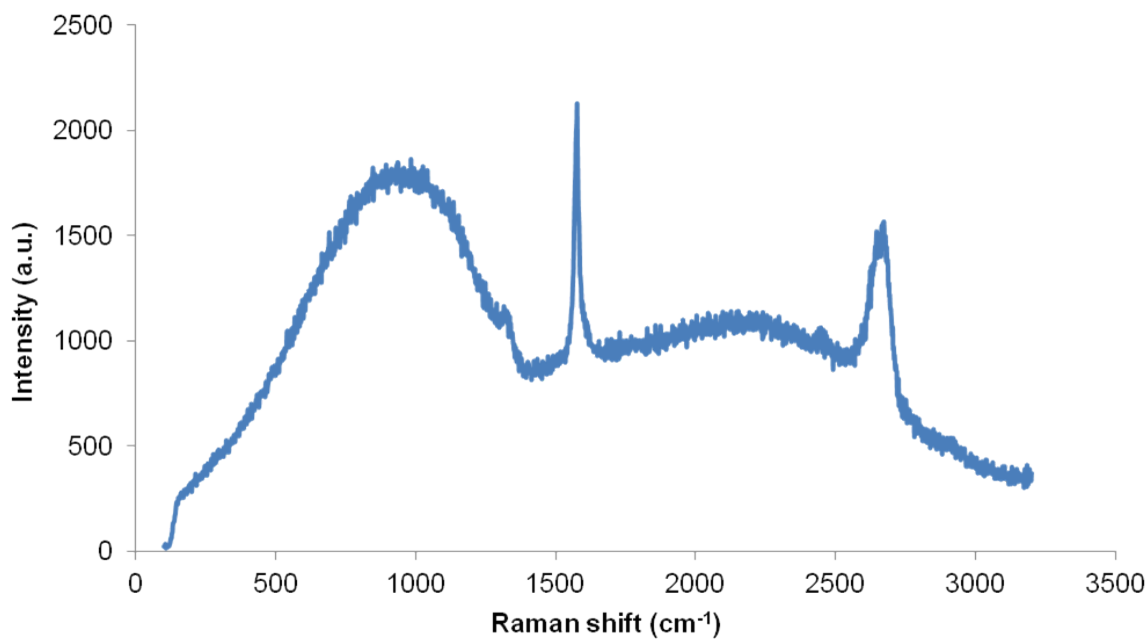

Figure S5. Raman Spectrum of PMPyS-G (fraction 4).

The Raman spectrum was measured on a Renishaw Raman microscope using a 633 nm He-Ne laser. To prepare the sample, the dispersion of PMPyS-G (fraction 4) in chloroform was cast on a filtration membrane. The spectrum shows two main peaks at  $\sim 1580$  and  $2680\text{ cm}^{-1}$  corresponding to the G and 2D bands. The G band represents the  $\text{sp}^2$ -hybridized carbon bonds and 2D band is the characteristic band which shows the thickness of the graphene sheets.
